# Supplementary material for: Using hydrogen peroxide to mediate through a one-step hydrothermal method for the fast and green synthesis of N-CDs
Source: Royal Society of Chemistry journal article supplement (doi:10.1039/c5ra12976a), 2015-01-01
Supplement: c5ra12976a1.pdf [file c5ra12976a1.pdf]

## Using Hydrogen Peroxide to Mediate through One-Step Hydrothermal Method for the Fast and Green Synthesis of N-CDs

Jiangling He, Bingfu Lei, Haoran Zhang, Mingtao Zheng, Hanwu Dong, Jianle Zhuang, Yong Xiao\* and Yingliang Liu\*

Table S1 Quantum yield of sample 1, sample 2, sample 3 and sample 4

| Samples                                         | Refractive index of solvent ( <i>n</i> ) | Quantum yield ( <i>QY</i> ) |
|-------------------------------------------------|------------------------------------------|-----------------------------|
| Quinine sulfate                                 | 1.33                                     | 54.0% (known)               |
| 1 (cocoon silk +H <sub>2</sub> O)               | 1.33                                     | 1.98%                       |
| 2 (cocoon silk +H <sub>2</sub> O <sub>2</sub> ) | 1.33                                     | 24.0%                       |
| 3 (peptide + H <sub>2</sub> O <sub>2</sub> )    | 1.33                                     | 25.1%                       |
| 4 (peptide+ H <sub>2</sub> O)                   | 1.33                                     | 2.04%                       |

| Samples                                      | QY %  | D/nm | $\tau_{\text{ave.}}$ /ns |
|----------------------------------------------|-------|------|--------------------------|
| 1(not adding H <sub>2</sub> O <sub>2</sub> ) | 1.98  | 167  | 1.24                     |
| 2 (adding H <sub>2</sub> O <sub>2</sub> )    | 24.00 | 7.4  | 3.99                     |

Table S2 Quantitative comparison of sample 1 and sample 2

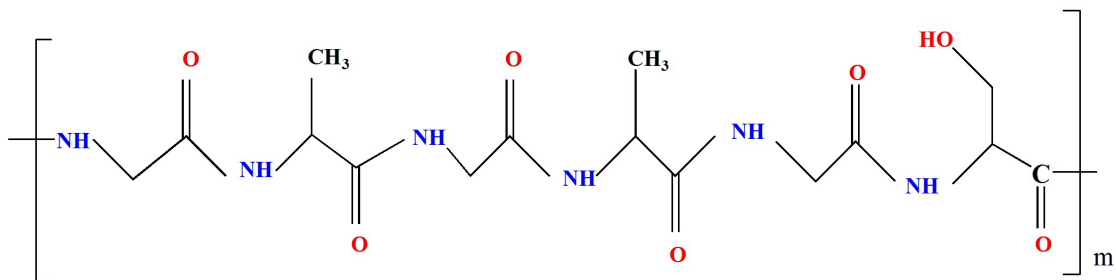

Fig. S1 The structure of precursor polymerization before carbonization

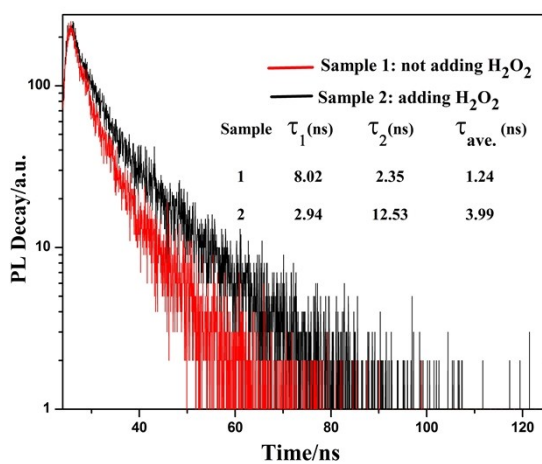

Fig. S2 PL lifetime decay curves of the sample 1 and sample 2 at room temperature when  $\lambda_{ex}$ = 370 nm and  $\lambda_{em}$ =438 nm.

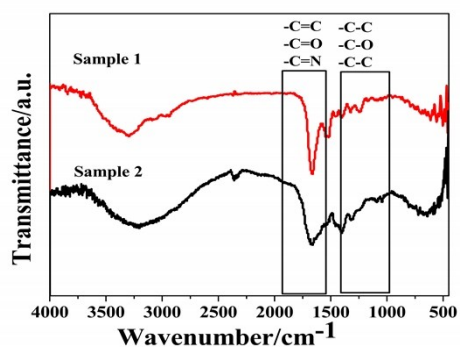

Fig. S3 The FTIR spectra of sample 1 and sample 2.

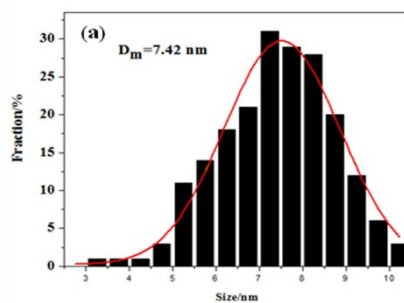

Fig. S4 The size distribution of N-CDs.

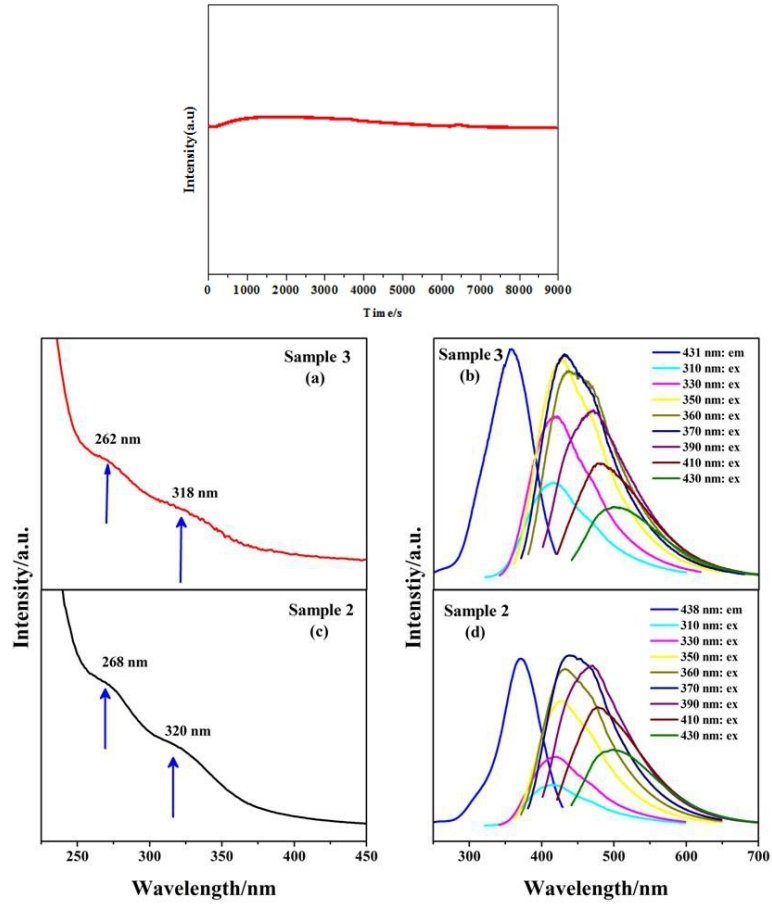

Fig. S5 stability of N-CDs solution under ultraviolet light ( $\lambda_{\text{ex}} = 365 \text{ nm}$ ).

Fig. S6 UV-Vis absorption spectra of liquid sample 3 (a) and sample 2 (c); (b) and (d) are the PL spectra excited by different

excitation wavelengths and their best excitation spectra (blue line) at 431 nm emission and 438 nm emission of sample 3 and sample 2, respectively. The excitation wavelength was varied from 310 nm to 430 nm. Colors correspond to different excitation wavelength: cyan, magenta, yellow, dark yellow, navy, purple, wine, and olive correspond to 310, 330, 350, 360, 370, 390, 410, and 430 nm.

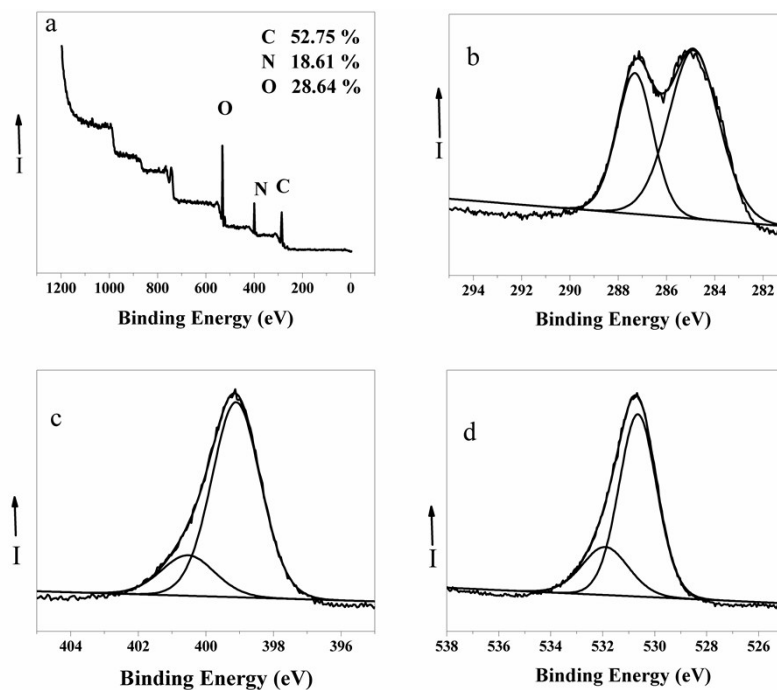

**Fig. S7** XPS spectra of the N-CDs when peptide reacts with  $H_2O_2$  (a) Survey spectrum. (b)  $C_{1s}$  spectrum. (c)  $N_{1s}$  spectrum. (d)  $O_{1s}$  spectrum.

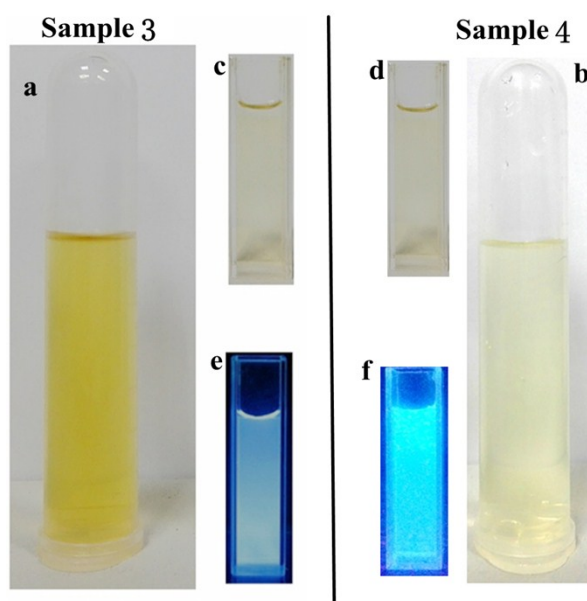

**Fig. S8** As-prepared reaction products when peptide is raw material reacting with H<sub>2</sub>O<sub>2</sub> (sample 3) and H<sub>2</sub>O (sample 4) under day light and UV-light ( $\lambda_{\text{ex}} = 365 \text{ nm}$ ).

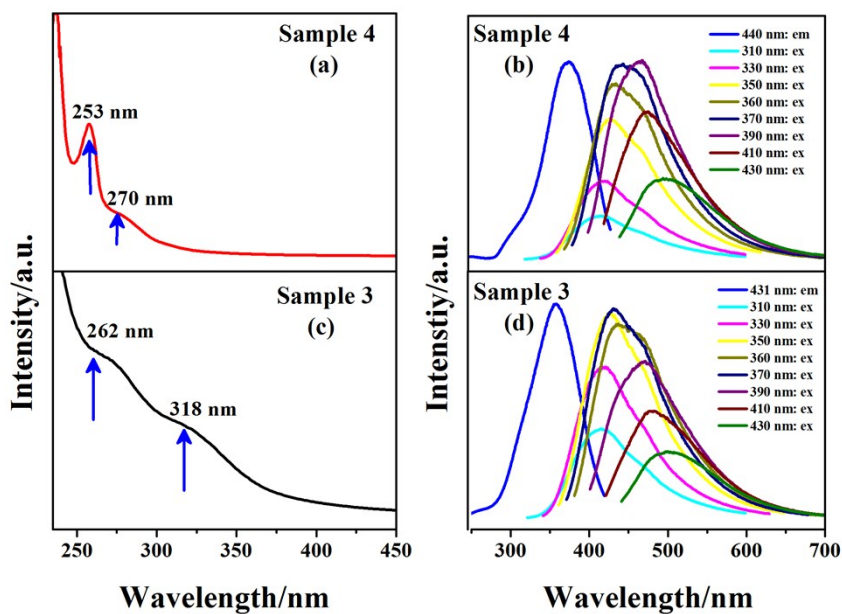

**Fig. S9** UV-Vis absorption spectra of liquid sample 4 (a) and sample 3 (c); (b) and (d) are the PL spectra excited by different excitation wavelengths and their best excitation spectra (blue line) at 440 nm emission and 431 nm emission of sample 4 and sample 3, respectively. The excitation wavelength was varied from 310 nm to 430 nm. Colours correspond to different excitation wavelength: cyan, magenta, yellow, dark yellow, navy, purple, wine, and olive correspond to 310, 330, 350, 360, 370, 390, 410, and 430 nm.

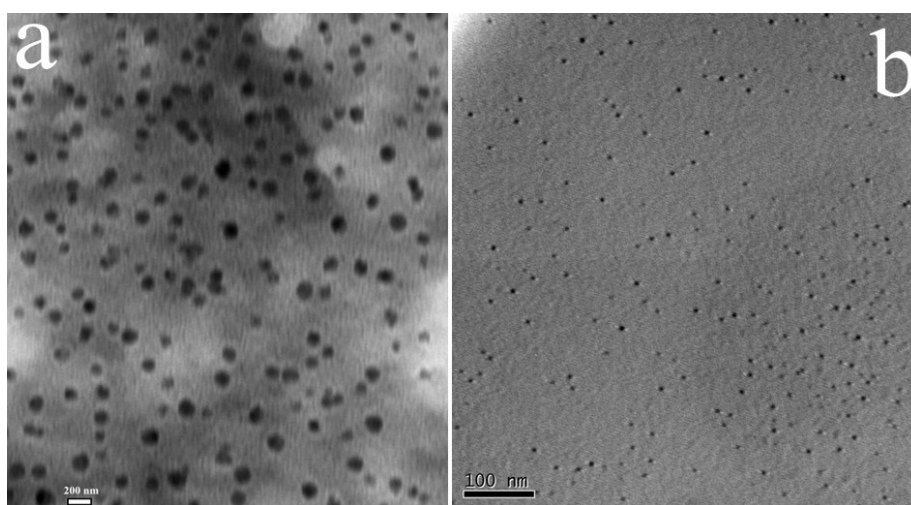

**Fig. S10** (a) and (b) are the TEM images of the sample 4 and sample 3, respectively.

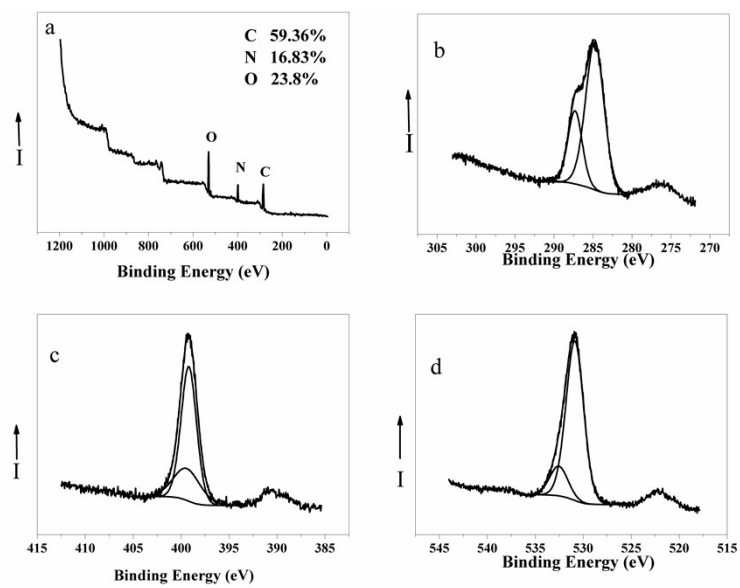

**Fig. S11** XPS spectra of the nanoparticles when peptide reacts with deionized water. (a) Survey spectrum. (b) C1s spectrum. (c) N1s spectrum. (d) O1s spectrum.
